# Supplementary material
Source: PubMed Central journal article supplement (PMC5729632)
Supplement: ba012229-suppl1.pdf [file ba012229-suppl1.pdf]

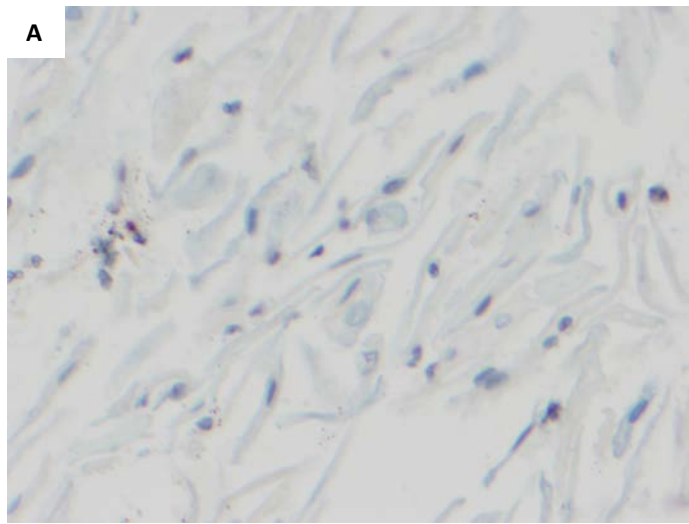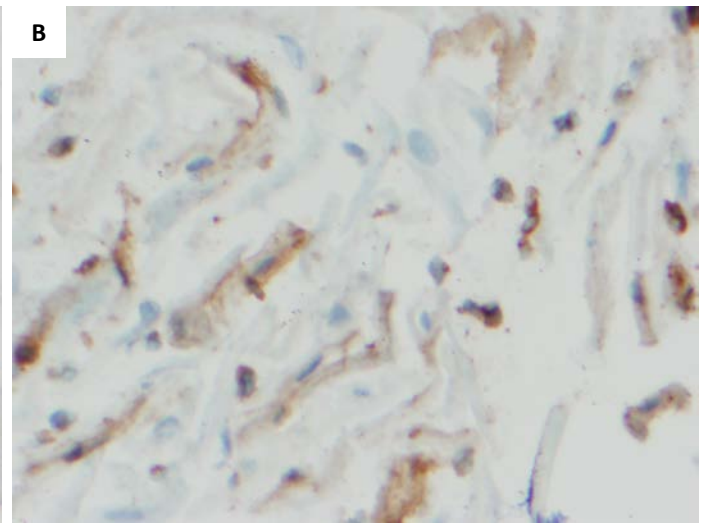

**Supplemental Figure 1: *CALR*-mutant buccal cells show absence of OCT4 pluripotency marker and heterogeneous expression of SSEA-1.** Buccal epithelial cells, which demonstrated *CALR*-mutation, cytokeratin AE1/AE3 staining, and absence of CD45 (Figure 1), were characterized with immunostains of (A) OCT4, a master pluripotency and embryonic stem cell marker, and (B) SSEA-1 (stage-specific embryonic antigen 1), found on multiple cell types including squamous epithelium and granulocytes.
